# Supplementary material for: Direct fabrication of gallium-doped nanoporous Pt on a Pt mesh for water splitting
Source: Royal Society of Chemistry journal article supplement (doi:10.1039/d5nr04643b), 2025-12-30
Supplement: d5nr04643b1.pdf [file d5nr04643b1.pdf]

Supplementary Information (SI) for Nanoscale.  
This journal is © The Royal Society of Chemistry 2025

## Supporting Information

# Direct Fabrication of Gallium Doped Nanoporous Pt on Pt Mesh for Water splitting

Weishun Song,<sup>[a]</sup> Xu Han,<sup>[a,b,c]</sup> Fengqiang Qi,<sup>[a,b,c]</sup> Mingyang Cai,<sup>[a]</sup> Xueqin Cao,<sup>[a]</sup> Yongyong Cao,<sup>\*,[d]</sup> Jian-Ping Lang<sup>\*,[a,b,c]</sup> and Hongwei Gu<sup>\*,[a]</sup>

[a] W. S. Song, X. Han, F. Q. Qi, M. Y. Cai, X. Q. Cao, Prof. J. P. Lang, Prof. H. W. G  
College of Chemistry, Chemical Engineering and Materials Science, Soochow University  
Suzhou 215123, Jiangsu, People's Republic of China  
E-mail: [jplang@suda.edu.cn](mailto:jplang@suda.edu.cn), [hongwei@suda.edu.cn](mailto:hongwei@suda.edu.cn)

[b] X. Han, F. Q. Qi, Prof. J. P. Lang  
State Key Laboratory of Organometallic Chemistry, Shanghai Institute of Organic Chemistry, Chinese Academy of Sciences  
Shanghai 200032, People's Republic of China

[c] X. Han, F. Q. Qi, Prof. J. P. Lang  
State Key Laboratory of Coordination Chemistry, School of Chemistry and Chemical Engineering, Nanjing University  
Nanjing 210023, Jiangsu, People's Republic of China

[d] Prof. Y. Y. Cao  
College of Biological, Chemical Science and Engineering, Jiaying University  
Jiaying, 314001, People's Republic of China

## Experimental section

### 1. Materials and reagents

Acetone, ethanol, isopropanol and sodium hydroxide (NaOH) were purchased from Sinopharm Group Chemical Reagent Co., Ltd. Nafion solution (0.5 wt %), commercial 20 wt% Pt/C were purchased from Sigma-Aldrich. Commercial RuO<sub>2</sub> was purchased from Shanghai yuanye Bio-Technology Co., Ltd. Nitric acid (HNO<sub>3</sub>) was purchased from Chinatsu Specialty Products Co., Ltd. Gallium was purchased from Chaoyang Jinmei Gallium Industry Co., Ltd. Pt mesh purchased from Kejing New Material Technology Co., Ltd. All the chemicals were analytical purity and used as received without any further purification unless stated otherwise.

### 2. Material characterization

The morphologies of samples were characterized by scanning electron microscope (SEM, Hitachi S-4700), Field emission scanning electron microscope (FESEM, Hitachi Regulus 8230) transmission electron microscope (TEM, TecnaiG220, FEI). The X-ray diffraction (XRD) patterns of synthesized catalysts were tested by X'Pert-Pro MPD diffractometer (Netherlands PAN Atypical) with a Cu K $\alpha$ -ray source ( $\lambda = 1.540598 \text{ \AA}$ ). Elemental analysis of C, Pt, Ga and O in the samples was detected by SEM energy-dispersive-X-ray spectroscopy (SEM-EDX). The larger-magnified nanostructure and EDX elemental mapping was characterized using a high-resolution TEM (HRTEM, Talos F200X G2). To further analyze the surface electronic structure of the nanomaterials, X-ray photoelectron spectroscopy (XPS, Escalab250Xi, UK) was performed using a hemispherical electron energy analyser. X-ray absorption fine structures (XAFS) of the Pt L<sub>3</sub>-edge were measured using an easyXAFS300+ instrument.

### 3. Preparation of commercial comparison electrodes

Pt/C and RuO<sub>2</sub> electrodes: 5 mg of Pt/C (20 wt%) was added into a mixed solution consisting of isopropanol (970  $\mu\text{L}$ ) and Nafion solution (30  $\mu\text{L}$ ). After ultrasonic treatment for at least 30 min, 21  $\mu\text{L}$  of the as-obtained homogeneous ink solution was dropped onto Platinum carbon electrode. And the commercial RuO<sub>2</sub> electrode was made via a similar process.

### 4. Electrochemical measurements

Electrochemical measurements were conducted on a CHI760E electrochemical workstation at room temperature by using a three-electrode cell, typically with a reference electrode (saturated Ag/AgCl), a counter electrode (graphite rod), and a working electrode (NpPt (Ga)). To prepare the sample electrode, the Pt mesh (2.0 cm  $\times$  2.0 cm) was cut into 0.5 cm  $\times$  1.0 cm for subsequent electrochemical test, and the actual effective area contacting with the electrolyte is 0.5 cm<sup>2</sup>. The electrodes of other samples (NpPt (Ga), NpPt (Ga)-1, etc.) for HER were prepared via the same way. All the presented potentials were 95% iR corrected unless otherwise indicated, followed by conversion to the RHE scale using the Nernst equation:  $ERHE = E_{\text{saturated Ag/AgCl}} + 0.0591 \times \text{pH} + 0.197$ . LSV polarization curves for HER was recorded at a scan rate of 1 mVs<sup>-1</sup>. Under 1.0 M KOH, the current densities were 10 mA cm<sup>-2</sup>, 100 mA cm<sup>-2</sup>, and 200 mA cm<sup>-2</sup>, respectively. The HER performance of the catalyst was detected by the time potential method. In a non-faradaic region, the electrochemical double layer capacitance ( $C_{dl}$ ) can be calculated from the cyclic voltammograms measured at different scan rates ( $v = 20, 40, 60, 80, 100$  and  $120 \text{ mV s}^{-1}$ ). The current density difference of the half-potential at the

same sweep speed against the scan rates were plotted and fitted to obtain  $C_{dl}$  values. Electrochemical impedance spectroscopy (EIS) was measured in the frequency scan range from 0.01 kHz to 100 kHz.

## 5. Theoretical calculations

All calculations were performed by a spin-polarized density functional theory (DFT) approach using the Vienna Ab initio Simulation Package (Vasp) <sup>cod<sup>1</sup>, <sup>2</sup></sup>. The projector augmented-wave (PAW) potentials were adopted to describe the electron correlation interactions<sup>3</sup>, and the Perdew, Burke, and Ernzerhof (PBE) within the generalized gradient approximation (GGA) approach was employed<sup>4</sup>. The DFT-D3 was considered to correct the interaction of van der Waals forces in all computation<sup>4</sup>. A vacuum space exceeds 15.00 Å was employed to avoid the interaction between two periodic units. On the plane-wave basis of electron convergence with an energy cutoff of 520 eV, the convergence criteria for force and energy were set to 0.05 eV/Å and 10<sup>-5</sup> eV of the total energy with respect to the calculation accuracy, respectively. The Brillouin zones were sampled with a K-point grid of 3 × 3 × 1 for all geometry optimization and electronic properties calculation. The electron charge transfer between substrate and adsorbates was calculated using the Bader charge analysis method<sup>5, 6</sup>. The correction term of the Gibbs free energy change ( $\Delta G$ ) under standard conditions (298.15 K and 0.1 MPa) was employed in the computational hydrogen electrode (CHE) model proposed by Nørskov et al<sup>7, 8</sup>.

In this regard, the Gibbs free energy change of each step was obtained by the equation:  $\Delta G = \Delta E + \Delta E_{ZPE} + \int C_p dT - T\Delta S + \Delta G_U$ , where  $\Delta E$  the free energy change that can be obtained from DFT calculations,  $\Delta E_{ZPE}$  and  $\Delta S$  are the zero-point correction energy and entropy gradient, respectively;  $\int C_p dT$  is the enthalpic temperature correction, and considering at a temperature of 298.15 K.  $\Delta G_U = eU$ , is the electrode potential contribution.

The applied potential ( $U$ ) was defined as the maximum Gibbs free energy change ( $-\Delta G_{max}/e$ ) along the reaction path, and to ensure that each elementary reaction step was exergonic, it was determined by the potential-determining step (PDS).

## 6. Supplemental Figures and Tables

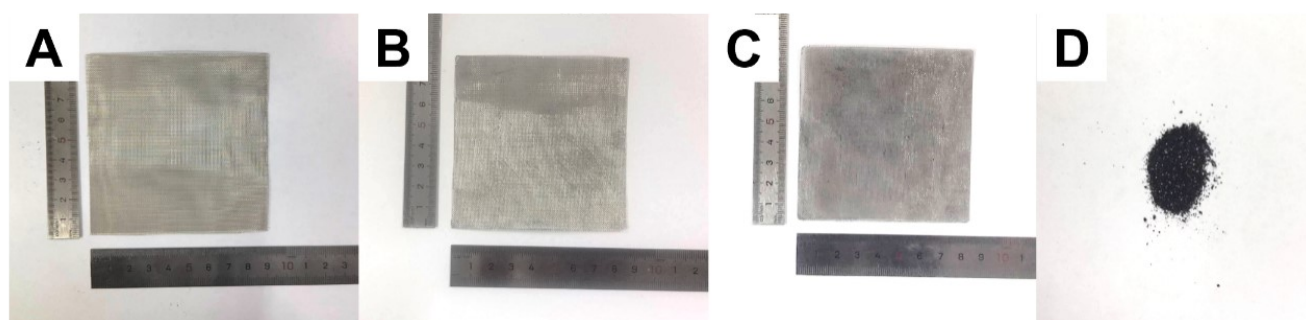

**Fig. S1.** the optical images of the mesh sample achieved at different temperature (A) 25°C, (B) 150°C, (C) 200°C, (D) 250°C, size 8 × 8 cm<sup>2</sup>.

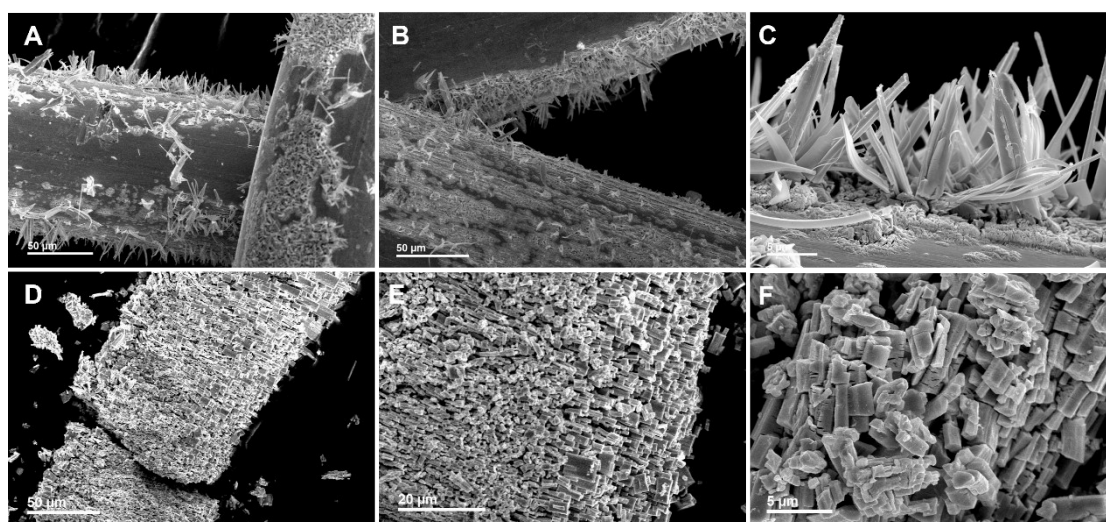

**Fig. S2.** (A-C) SEM images of NpPt (Ga)-1 at different magnifications; (D-F) SEM images of NpPt (Ga)-2 at different magnifications.

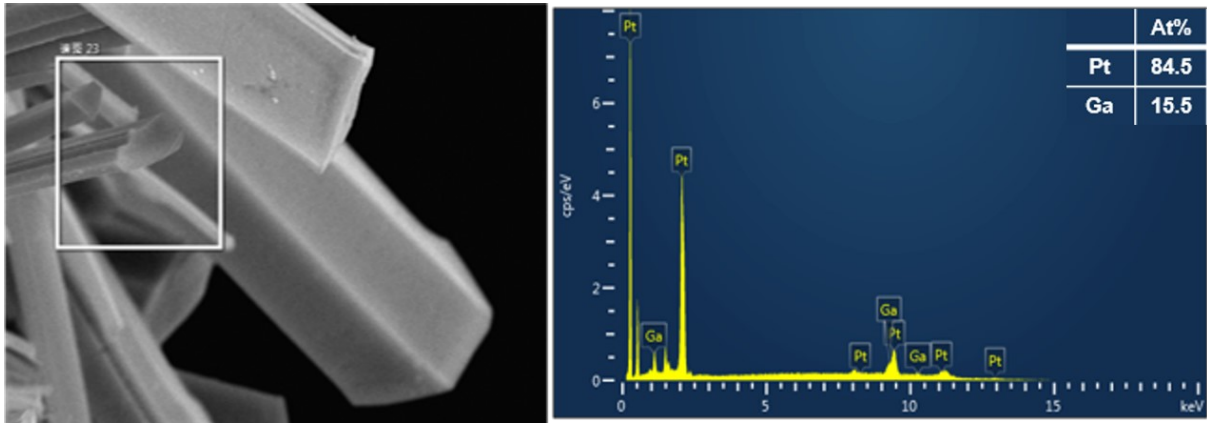

Fig. S3. SEM-EDX image of NpPt (Ga) catalyst.

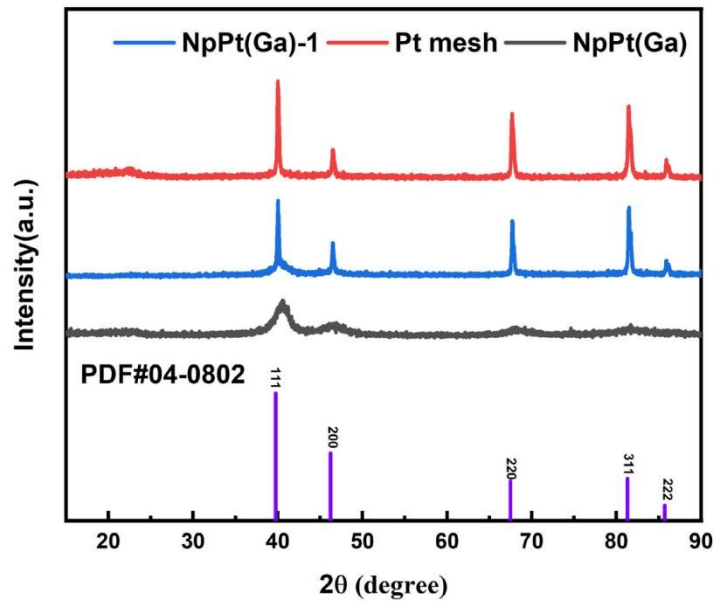

Fig. S4. XRD patterns of NpPt (Ga)-1, NpPt (Ga) and Pt mesh

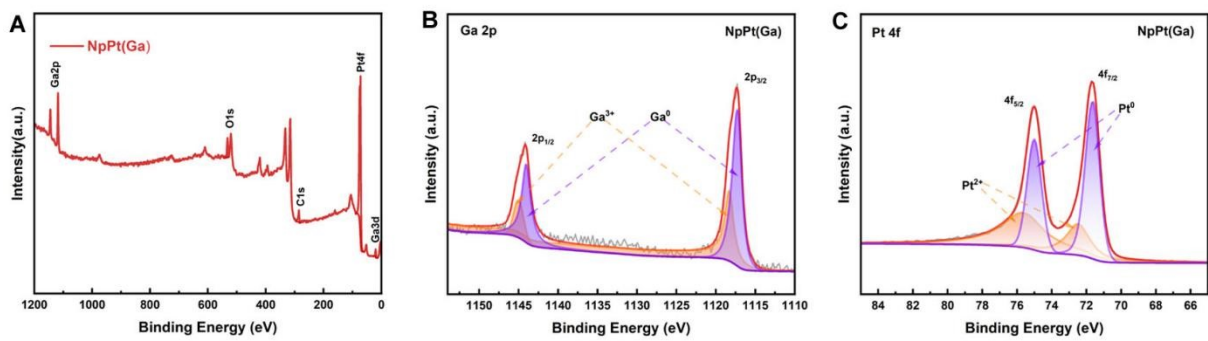

Fig. S5. XPS spectra of NpPt (Ga) (A) Ga 2p and (B) Pt 4f

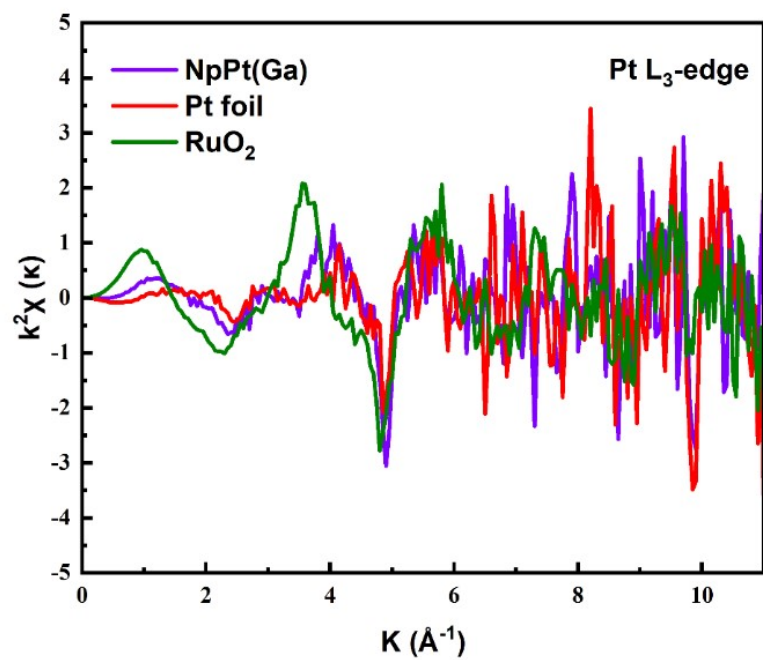

Fig. S6. The  $k^2$ -weighted EXAFS spectra in Pt k-space.

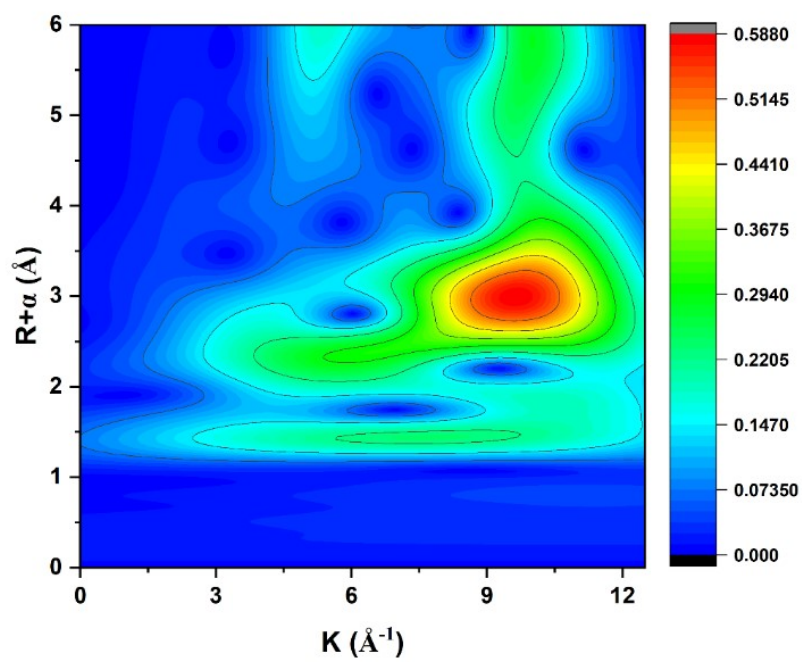

Fig. S7. Wavelet transform of Pt foil XAFS data.

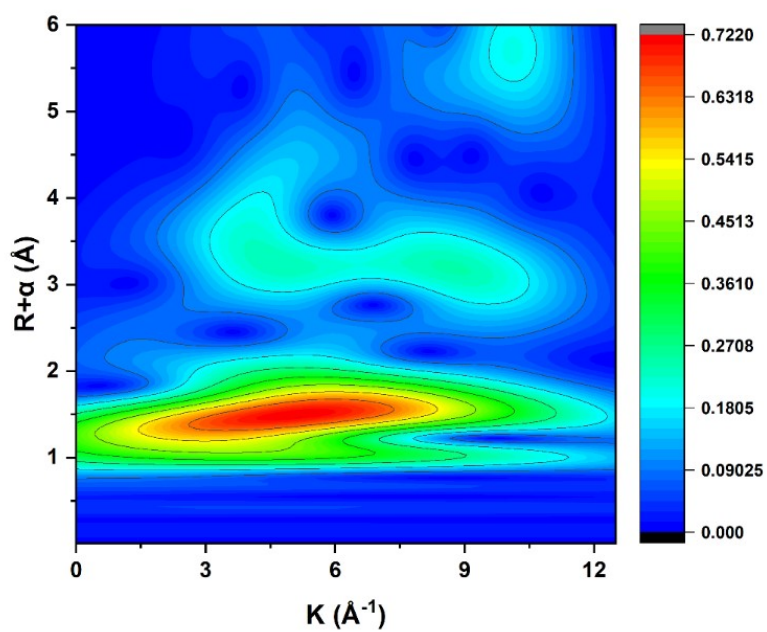

Fig. S8. Wavelet transform of PtO<sub>2</sub> XAFS data.

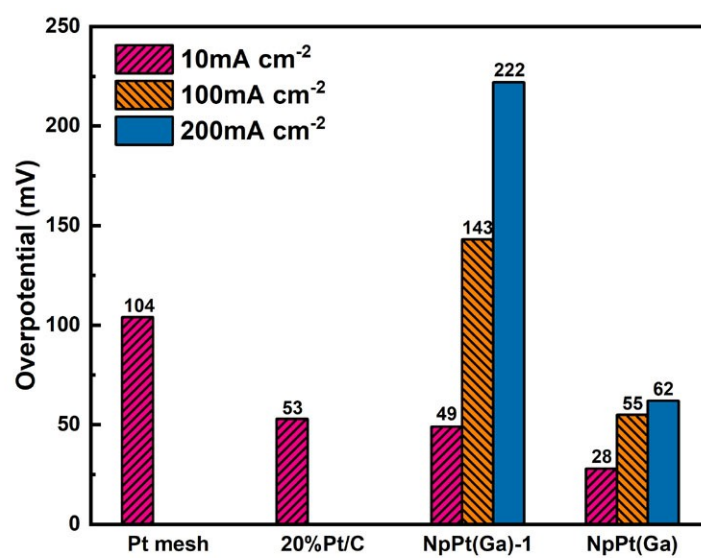

Fig. S9. Comparison of overpotential at 10 mA cm<sup>-2</sup>, 100 mA cm<sup>-2</sup> and 200 mA cm<sup>-2</sup>.



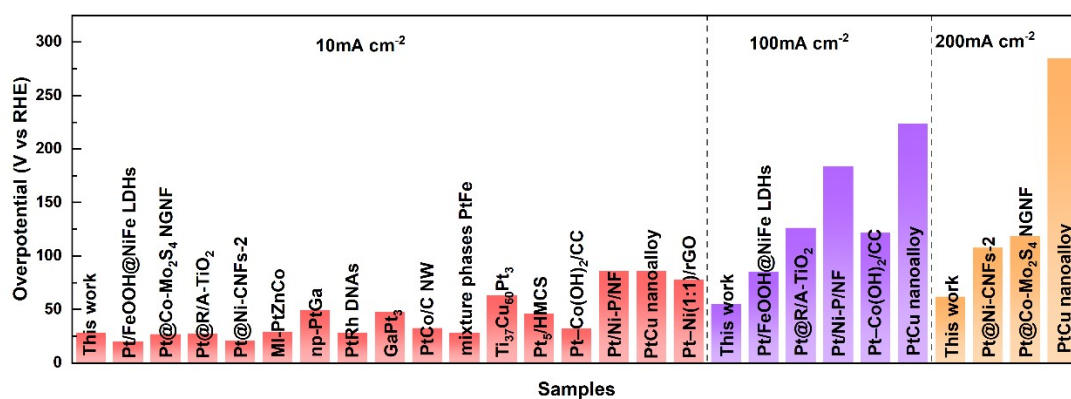

Fig. S10. Comparison of some representative catalysts with HER activity.

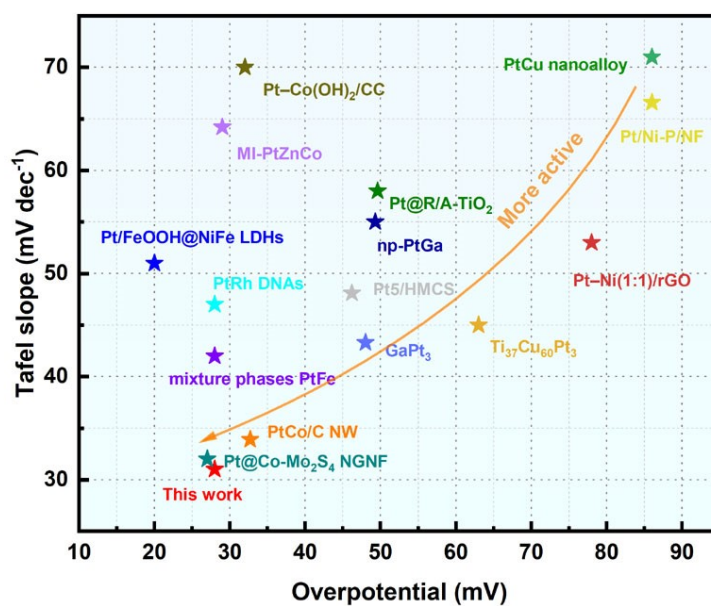

Fig. S11. Overpotential and Tafel slope comparison of at a current density of  $10 \text{ mA cm}^{-2}$ .

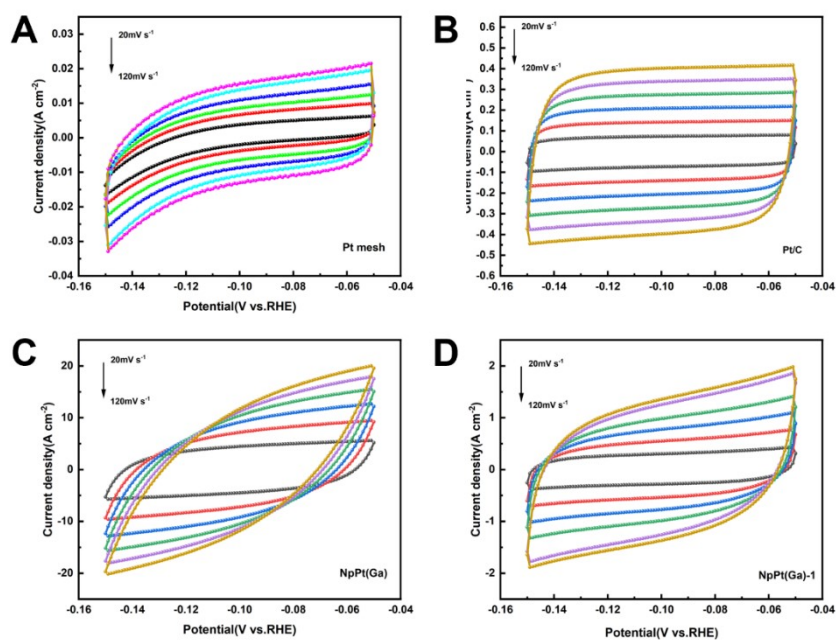

**Fig. S12.** Cyclic voltammograms (CVs) for (A) Pt mesh, (B) Pt/C, (C) NpPt(Ga) and (D) NpPt(Ga)-1 measured at different scan rates.

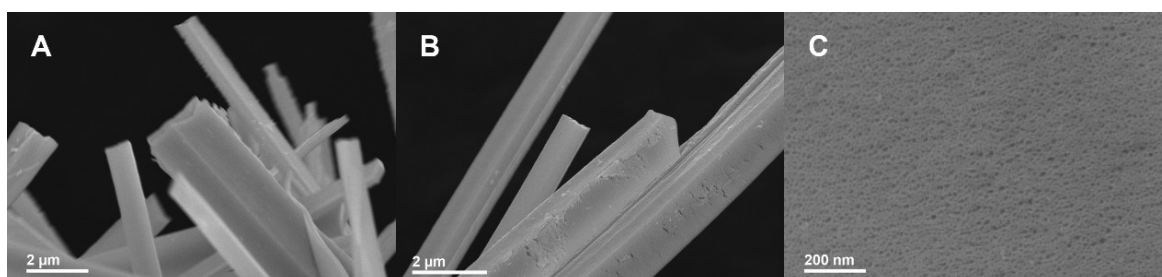

**Fig. S13.** SEM image of NpPt (Ga) catalyst after stability testing.

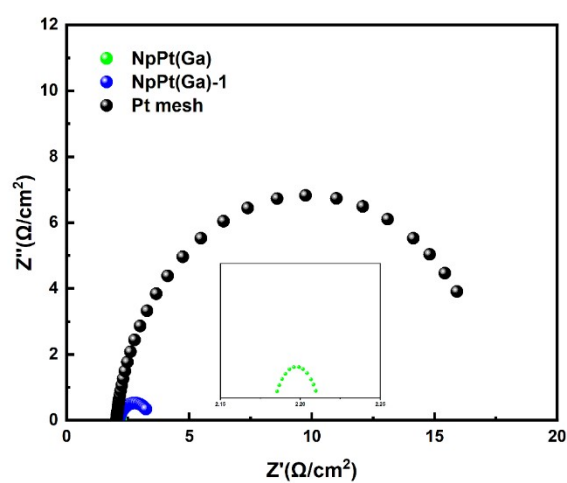

**Fig. S14.** Nyquist plots of all studied electrocatalysts.

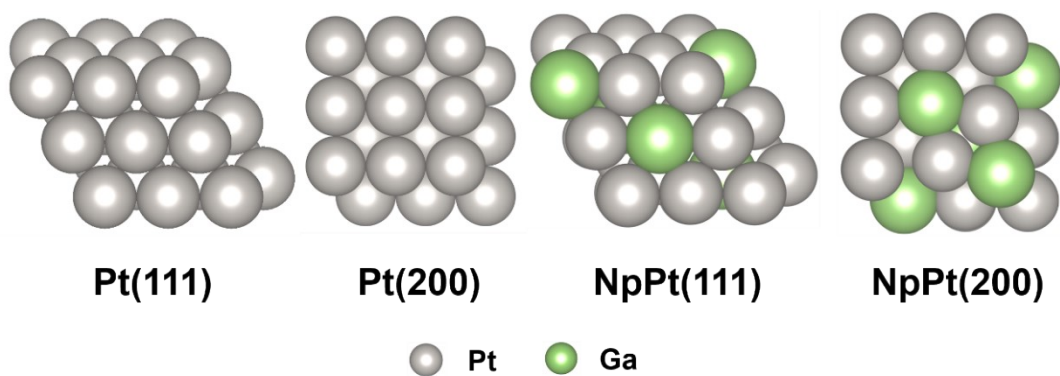

**Fig. S15.** four different models were constructed, including Pt (111), Pt (200), NpPt (Ga) (111) and NpPt (Ga) (200).

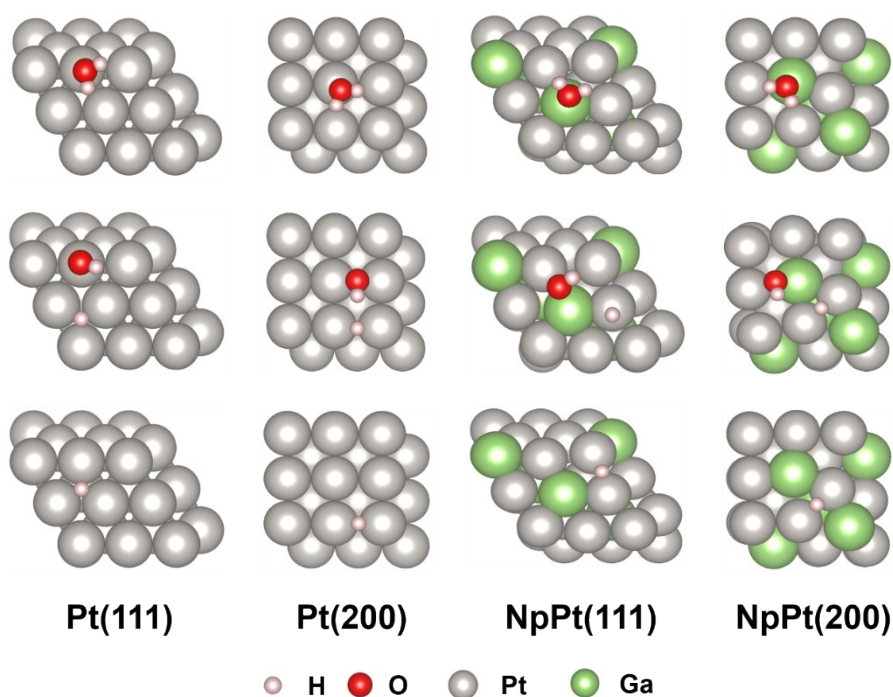

**Fig. S16.** H protons adsorption on Pt mesh (111), Pt mesh (200), NpPt (Ga) (111) and NpPt (Ga) (200).

**TableS1.** The EXAFS fitting parameters<sup>a</sup> of NpPt (Ga)

| Sample    | Path  | N <sup>b</sup> | R(Å) | $\sigma^2(\text{\AA}^2)$ | $\Delta E_0(\text{eV})$ | R <sup>c</sup> |
|-----------|-------|----------------|------|--------------------------|-------------------------|----------------|
| NpPt (Ga) | Pt-Pt | 4              | 2.48 | 0.0454                   | 13                      | 0.012          |
|           | Pt-Ga | 0.2            | 2.65 | 0.0085                   |                         |                |

<sup>a</sup>  $S_0^2$  was fixed as 1.0. Data ranges:  $3 \leq k \leq 9.9 \text{ \AA}^{-1}$ ,  $1.15 \leq R \leq 3 \text{ \AA}$ . The number of variable parameters is 6. <sup>b</sup> the coordination numbers were constrained as  $N(\text{Pt-Pt}) = 4$  and  $N(\text{Pt-Ga}) = 0.2$  based on the crystal structure. <sup>c</sup> R factor for fit is 0.012. R (Å): Interatomic distance.  $\sigma^2$ : Debye-Waller factor.  $\Delta E_0$ : Energy shift



**TableS2.** Comparison of some representative catalysts for HER properties.

| Catalyst                                          | j<br>(mA cm <sup>-2</sup> ) | Overpotential<br>(mV) | Tafel slope (mV<br>dec <sup>-1</sup> ) | References       |
|---------------------------------------------------|-----------------------------|-----------------------|----------------------------------------|------------------|
|                                                   | 10                          | 28.00                 |                                        |                  |
| NpPt (Ga)                                         | 100                         | 55.00                 | 31.01                                  | This Work        |
|                                                   | 200                         | 62.00                 |                                        |                  |
| Ti <sub>37</sub> Cu <sub>60</sub> Pt <sub>3</sub> | 10                          | 63.00                 | 45.00                                  | 1 <sup>9</sup>   |
| MI-PtZnCo                                         | 10                          | 29.00                 | 64.20                                  | 2 <sup>10</sup>  |
| Pt-Ni <sub>(1:1)</sub> /rGO                       | 10                          | 78.00                 | 53.00                                  | 3 <sup>11</sup>  |
| np-PtGa                                           | 10                          | 49.30                 | 55.00                                  | 4 <sup>12</sup>  |
| PtRh DNAs                                         | 10                          | 28.00                 | 47.00                                  | 5 <sup>13</sup>  |
| GaPt <sub>3</sub>                                 | 10                          | 27.00                 | 43.30                                  | 6 <sup>14</sup>  |
| PtCo/C NW                                         | 10                          | 32.70                 | 33.90                                  | 7 <sup>15</sup>  |
|                                                   | 10                          | 28.00                 |                                        |                  |
| mixture phases PtFe                               | 50                          | 91.00                 | 42.00                                  | 8 <sup>16</sup>  |
| Pt <sub>5</sub> /HMCS                             | 10                          | 46.20                 | 48.10                                  | 9 <sup>17</sup>  |
|                                                   | 10                          | 20.00                 |                                        |                  |
| Pt/FeOOH@NiFe LDHs                                | 50                          | 60.00                 | 51.00                                  | 10 <sup>18</sup> |
|                                                   | 100                         | 85.00                 |                                        |                  |
| Pt@R/A-TiO <sub>2</sub>                           | 10                          | 49.60                 | 58.00                                  | 11 <sup>19</sup> |
| Pt-NiO <sub>x</sub> /Ni                           | 100                         | 86.00                 | ~                                      | 12 <sup>20</sup> |
|                                                   | 10                          | 86.00                 |                                        |                  |
| Pt/Ni-P/NF                                        | 100                         | 184.00                | 66.60                                  | 13 <sup>21</sup> |
|                                                   | 10                          | 32.00                 |                                        |                  |
| Pt-Co(OH) <sub>2</sub> /CC                        | 20                          | 54.00                 | 70.00                                  | 14 <sup>22</sup> |
|                                                   | 100                         | 122.00                |                                        |                  |
|                                                   | 10                          | 86.00                 |                                        |                  |
| PtCu nanoalloy                                    | 100                         | 224.00                | 71.00                                  | 15 <sup>23</sup> |
|                                                   | 200                         | 228.00                |                                        |                  |
|                                                   | 10                          | 20.80                 |                                        |                  |
| Pt@Ni-CNFs-2                                      | 50                          | 49.90                 | 20.10                                  | 16 <sup>24</sup> |
|                                                   | 200                         | 107.80                |                                        |                  |
|                                                   | 10                          | 27.00                 |                                        |                  |
| Pt@Co-Mo <sub>2</sub> S <sub>4</sub> NGNF         | 100                         | 79.00                 | 32.00                                  | 17 <sup>25</sup> |
|                                                   | 200                         | 119.00                |                                        |                  |

**TableS3.** Comparison of some representative catalysts used for water splitting in Pt-based materials.

| Catalyst                                                                                         | j<br>(mA cm <sup>-2</sup> ) | Voltage<br>(V) | Ret.             |
|--------------------------------------------------------------------------------------------------|-----------------------------|----------------|------------------|
| Pt-CoMo <sub>2</sub> S <sub>4</sub> @NGNF    IrO <sub>2</sub>                                    | 10                          | 1.510          | 1 <sup>25</sup>  |
| Pt-CoS <sub>2</sub> /CC  Pt-CoS <sub>2</sub> /CC                                                 | 10                          | 1.550          | 2 <sup>26</sup>  |
| Pt/Ni-P/NF    Ni-P/NF                                                                            | 10                          | 1.590          | 3 <sup>21</sup>  |
| Pt-PtCoRu    RuO <sub>2</sub>                                                                    | 10                          | 1.580          | 4 <sup>27</sup>  |
| NF@Pt-1    NF@Pt-1                                                                               | 10                          | 1.575          | 5 <sup>28</sup>  |
| Pt-αFe <sub>2</sub> O <sub>3</sub> @NF    Pt-αFe <sub>2</sub> O <sub>3</sub> @NF                 | 10                          | 1.510          | 6 <sup>29</sup>  |
| NiFe-LDH-Pt-ht    NiFe-LDH-Pt-ht                                                                 | 10                          | 1.505          | 7 <sup>30</sup>  |
| T-Pt-Co <sub>4</sub> N    T-Co (OH)F                                                             | 10                          | 1.550          | 8 <sup>31</sup>  |
| PtNiP MNs    PtNiP MNs                                                                           | 10                          | 1.560          | 9 <sup>32</sup>  |
| Pt-NiFe PBA    Pt-NiFe PBA                                                                       | 10                          | 1.460          | 10 <sup>33</sup> |
| PtNiP MNs/C    PtNiP MNs/C                                                                       | 10                          | 1.590          | 11 <sup>32</sup> |
| Pt-CoS <sub>2</sub> /CC    Pt-CoS <sub>2</sub> /CC                                               | 10                          | 1.550          | 12 <sup>26</sup> |
| PtOaPdObNPs@Ti <sub>3</sub> C <sub>2</sub> Tx<br>  PtOaPdObNPs@Ti <sub>3</sub> C <sub>2</sub> Tx | 10                          | 1.530          | 13 <sup>34</sup> |
| Pt-NiO/Gr-SUS    Pt-NiO/Gr-SUS                                                                   | 10                          | 1.600          | 14 <sup>35</sup> |
| NpPt (Ga)    RuO <sub>2</sub>                                                                    | 10                          | 1.490          | This Work        |

## References

1. S. Grimme, S. Ehrlich and L. Goerigk, *Journal of Computational Chemistry*, 2011, **32**, 1456-1465.
2. C. Li, W. Zhang, Y. Cao, J. Y. Ji, Z. C. Li, X. Han, H. Gu, P. Braunstein and J. P. Lang, *Advanced Science*, 2024, **11**, 2401780.
3. G. Henkelman, A. Arnaldsson and H. Jónsson, *Computational Materials Science*, 2006, **36**, 354-360.
4. John P. Perdew, Kieron Burke and M. Ernzerhof, *John P. Perdew, Kieron Burke,\* Matthias Ernzerhof*, 1996, 77.
5. G. Kresse, Institut für Theoretische Physik und Technische Universität Wien, *Joubert, Phys. Rev. B*, 1999, 59.
6. Institut für Theoretische Physik, Technische Universität Wien, Wiedner Hauptstraße 5-10, A-1040 Wien and Austria, *Computational Materials Science*, 1996, **6**, 15-20.
7. E. Sanville, S. D. Kenny, R. Smith and G. Henkelman, *Journal of Computational Chemistry*, 2007, **28**, 899-908.
8. M. Yang, B. Qin, C. Si, X. Sun and B. Li, *Journal of Materials Chemistry A*, 2024, **12**, 2520-2560.
9. H. Zhang, J. Qin, J. Tian and J. Shen, *International Journal of Hydrogen Energy*, 2024, **82**, 952-958.
10. Y. Wang, H. Lv, L. Sun, F. Jia and B. Liu, *Advanced Energy Materials*, 2022, **12**, 2201478.
11. Z. Du, Y. Wang, J. Li and J. Liu, *Journal of Nanoparticle Research*, 2019, **21**, 13.
12. Y. Wang, Z. Wang, J. Zhang, C. Zhang, H. Gao, J. Niu and Z. Zhang, *Nanoscale*, 2018, **10**, 17070-17079.
13. Z. Han, R.-L. Zhang, J.-J. Duan, A.-J. Wang, Q.-L. Zhang, H. Huang and J.-J. Feng, *International Journal of Hydrogen Energy*, 2020, **45**, 6110-6119.
14. S.-C. Lim, C.-Y. Chan, K.-T. Chen and H.-Y. Tuan, *Electrochimica Acta*, 2019, **297**, 288-296.
15. E. B. Tetteh, C. Gyan-Barimah, H.-Y. Lee, T.-H. Kang, S. Kang, S. Ringe and J.-S. Yu, *ACS Applied Materials & Interfaces*, 2022, **14**, 25246-25256.
16. Y. Shi, D. Zhang, H. Huang, H. Miao, X. Wu, H. Zhao, T. Zhan, X. Chen, J. Lai and L. Wang, *Small*, 2022, **18**, 2106947.
17. X. K. Wan, H. B. Wu, B. Y. Guan, D. Luan and X. W. Lou, *Advanced Materials*, 2019, **32**, 1901349.
18. Y.-C. Zhang, M. Zhao, J. Wu, Y. Wang, L. Zheng, F. Gu, J.-J. Zou, J. Gao and X.-D. Zhu, *ACS Catalysis*, 2024, **14**, 7867-7876.
19. W. Wu, K. Zhang, S. Wei, Y. Wang, Z. Zhang, P. Guo and G. Liu, *Chemical Engineering Journal*, 2024, **496**.
20. Q. Li, W. Cheng, C. Zeng, X. Zheng, L. Sun, Q. Jiang and Y. You, *International Journal of Hydrogen Energy*, 2022, **47**, 7504-7510.
21. D. Zhang, L. Nie, C. Lai, S. Ji, Z. Guo, Y. Hou, Y. Zhang and L. Lei, *Inorganic Chemistry Communications*, 2024, **160**, 112009.
22. Z. Xing, C. Han, D. Wang, Q. Li and X. Yang, *ACS Catalysis*, 2017, **7**, 7131-7135.
23. S. Ge, L. Zhang, J. Hou, S. Liu, Y. Qin, Q. Liu, X. Cai, Z. Sun, M. Yang, J. Luo and X. Liu, *ACS Applied Energy Materials*, 2022, **5**, 9487-9494.
24. M. Zhong, M. Xu, S. Ren, W. Li, C. Wang, M. Gao and X. Lu, *Energy & Environmental Science*, 2024, **17**, 1984-1996.

25. S. Vijayapradeep, N. Logeshwaran, S. Ramakrishnan, A. Rhan Kim, P. Sampath, D. Hwan Kim and D. Jin Yoo, *Chemical Engineering Journal*, 2023, **473**.
26. X. Han, X. Wu, Y. Deng, J. Liu, J. Lu, C. Zhong and W. Hu, *Advanced Energy Materials*, 2018, **8**.
27. X. Cao, L. Gao, J. Qu, L. Li, Y. Xie, Y. Zhao, G. Wang and H. Liu, *Small*, 2023, **19**.
28. B. Xiong, Q. Kang, M. Su, F. Gao and Q. Lu, *Journal of Power Sources*, 2023, **579**.
29. B. Ye, L. Huang, Y. Hou, R. Jiang, L. Sun, Z. Yu, B. Zhang, Y. Huang and Y. Zhang, *Journal of Materials Chemistry A*, 2019, **7**, 11379-11386.
30. S. Anantharaj, K. Karthick, M. Venkatesh, T. V. S. V. Simha, A. S. Salunke, L. Ma, H. Liang and S. Kundu, *Nano Energy*, 2017, **39**, 30-43.
31. Z. Wu, Y. Zhao, W. Xiao, Y. Fu, B. Jia, T. Ma and L. Wang, *ACS Nano*, 2022, **16**, 18038-18047.
32. C. Li, Y. Xu, D. Yang, X. Qian, X. Chai, Z. Wang, X. Li, L. Wang and H. Wang, *ACS Sustainable Chemistry & Engineering*, 2019, **7**, 9709-9716.
33. Z. Chen, D. Liu, Y. Gao, Y. Zhao, W. Xiao, G. Xu, T. Ma, Z. Wu and L. Wang, *Science China Materials*, 2021, **65**, 1217-1224.
34. B. Cui, B. Hu, J. Liu, M. Wang, Y. Song, K. Tian, Z. Zhang and L. He, *ACS Applied Materials & Interfaces*, 2018, **10**, 23858-23873.
35. S. Jeong, H. D. Mai, K.-H. Nam, C.-M. Park and K.-J. Jeon, *ACS Nano*, 2022, **16**, 930-938.
